# Supplementary material for: Prognostic significance of Traf2- and Nck- interacting kinase (TNIK) in colorectal cancer
Source: PubMed Central journal article supplement (PMC4619995; doi:10.1186/s12885-015-1783-y), 2015-10-24
Supplement: 12885_2015_1783_MOESM3_ESM.pdf [file 12885_2015_1783_MOESM3_ESM.pdf]

## Additional file 3: Seventeen Candidate genes

| Gene symbol    | Gene title                                                   | P value  | Fold change | Reported gene character                                                                                                                                                                                     |
|----------------|--------------------------------------------------------------|----------|-------------|-------------------------------------------------------------------------------------------------------------------------------------------------------------------------------------------------------------|
| <b>RPRD1A</b>  | regulation of nuclear pre-mRNA domain containing 1A          | 0.000744 | 1.68        | RPRD1A inhibits the Wnt/ $\beta$ -catenin signaling pathway. (29)                                                                                                                                           |
| <b>TESC</b>    | tescalcin                                                    | 0.000773 | 1.71        | The EF-hand calcium-binding protein. TESC may interact with NF- $\kappa$ B and colorectal cancer. (30)                                                                                                      |
| <b>ATF6</b>    | activating transcription factor 6                            | 0.001125 | 1.53        | A missense polymorphism in ATF6 gene is associated with hepatocellular carcinoma. (31)                                                                                                                      |
| <b>ZBED6</b>   | zinc finger, BED-type containing 6                           | 0.001207 | 1.55        | Transcriptional modulator ZBED6 affects cell cycle and growth of human colorectal cancer cells. (32)                                                                                                        |
| <b>TNIK</b>    | Traf2- and NCK- interacting kinase                           | 0.001370 | 1.58        | TNIK is essential for Wnt signaling and colorectal cancer growth. (11)                                                                                                                                      |
| <b>PROX1</b>   | prospero-related homeobox 1                                  | 0.001581 | 1.75        | PROX1 is a specific target of the $\beta$ -catenin/TCF pathway in the intestinal epithelium. PROX1 is upregulated in colorectal cancer, and may have a role in tumor progression in colorectal cancer. (33) |
| <b>S100A2</b>  | S100 calcium binding protein A2                              | 0.002094 | 1.79        | S100A2 is a predictive biomarker of pancreatic adenocarcinoma. (34)                                                                                                                                         |
| <b>INTS6</b>   | integrator complex subunit 6                                 | 0.002243 | 1.53        | Pseudogene INTS6P1 regulates its cognate gene INTS6 through competitive binding of miR-17-5p in hepatocellular carcinoma. (35)                                                                              |
| <b>CHRM3</b>   | cholinergic receptor, muscarinic 3                           | 0.003200 | 1.80        | CHRM3 is a novel prognostic factor of poor prognosis in patients with endometrial carcinoma. (36)                                                                                                           |
| <b>KCNJ2</b>   | potassium inwardly-rectifying channel, subfamily J, member 2 | 0.003200 | 1.51        | Upregulation of the inwardly rectifying potassium channel Kir2.1 (KCNJ2) modulates multidrug resistance of small-cell lung cancer under the regulation of miR-7 and the Ras/MAPK pathway. (37)              |
| <b>HMGA2</b>   | high mobility group AT-hook 2                                | 0.003961 | 1.88        | High-mobility group A2 overexpression is an unfavorable prognostic biomarker for nasopharyngeal carcinoma patients. (38)                                                                                    |
| <b>BMP4</b>    | bone morphogenetic protein 4                                 | 0.007427 | 1.50        | BMP4 inhibits breast cancer metastasis by blocking myeloid-derived suppressor cell activity. (39)                                                                                                           |
| <b>PHLDA1</b>  | pleckstrin homology-like domain, family A, member 1          | 0.008633 | 1.57        | PHLDA1 is a crucial negative regulator and effector of Aurora A kinase in breast cancer. (40)                                                                                                               |
| <b>IGF2</b>    | insulin-like growth factor 2                                 | 0.012791 | 1.97        | High IGF2 expression is associated with poor clinical outcome in human ovarian cancer. (41)                                                                                                                 |
| <b>DACH1</b>   | dachshund homolog 1                                          | 0.020715 | 1.64        | Silencing DACH1 promotes esophageal cancer growth by inhibiting TGF- $\beta$ signaling. (42)                                                                                                                |
| <b>COL11A1</b> | collagen, type XI, alpha 1                                   | 0.039616 | 1.57        | COL11A1 promotes tumor progression and predicts poor clinical outcome in ovarian cancer. (43)                                                                                                               |
| <b>DACT1</b>   | dapper, antagonist of beta-catenin, homolog 1                | 0.041573 | 1.52        | Expression and epigenetic regulation of DACT1 and DACT2 in oral squamous cell carcinoma. (44)                                                                                                               |
