# Supplementary material for: Prognostic significance of Traf2- and Nck- interacting kinase (TNIK) in colorectal cancer
Source: Springer Nature journal article supplement (doi:10.1186/s12885-015-1783-y), 2015-10-24
Supplement: MOESM1 [file 9745348]

Additional file 1: Patients' characteristics for microarray analysis (N = 152)

| <b>Variables</b>                                 |                          | <b>No (%)</b>   |
|--------------------------------------------------|--------------------------|-----------------|
| <b>Age</b>                                       | <b>&lt; 70</b>           | <b>86 (57)</b>  |
|                                                  | <b>≥ 70</b>              | <b>66 (43)</b>  |
| <b>Gender</b>                                    | <b>male</b>              | <b>101 (66)</b> |
|                                                  | <b>female</b>            | <b>51 (34)</b>  |
| <b>Histology<br/>(TNM 7th)</b>                   | <b>G1</b>                | <b>58 (38)</b>  |
|                                                  | <b>G2</b>                | <b>87 (57)</b>  |
|                                                  | <b>G3</b>                | <b>7 (5)</b>    |
| <b>Tumor location</b>                            | <b>right-sided colon</b> | <b>41 (27)</b>  |
|                                                  | <b>left-sided colon</b>  | <b>76 (50)</b>  |
|                                                  | <b>rectum</b>            | <b>35 (23)</b>  |
| <b>Stage<br/>(TNM 7th)</b>                       | <b>I</b>                 | <b>27 (18)</b>  |
|                                                  | <b>II</b>                | <b>69 (45)</b>  |
|                                                  | <b>III</b>               | <b>56 (37)</b>  |
| <b>Depth of tumor<br/>invasion<br/>(TNM 7th)</b> | <b>T1</b>                | <b>5 (3)</b>    |
|                                                  | <b>T2</b>                | <b>28 (18)</b>  |
|                                                  | <b>T3</b>                | <b>76 (50)</b>  |
|                                                  | <b>T4</b>                | <b>43 (29)</b>  |
| <b>Lymphatic invasion</b>                        | <b>(-)</b>               | <b>60 (39)</b>  |
|                                                  | <b>(+)</b>               | <b>92 (61)</b>  |
| <b>Venous invasion</b>                           | <b>(-)</b>               | <b>26 (17)</b>  |
|                                                  | <b>(+)</b>               | <b>126 (83)</b> |
| <b>Lymph node<br/>metastasis</b>                 | <b>(-)</b>               | <b>96 (63)</b>  |
|                                                  | <b>(+)</b>               | <b>56 (37)</b>  |
| <b>CEA</b>                                       | <b>&lt; 5 ng/ml</b>      | <b>94 (62)</b>  |
|                                                  | <b>≥ 5 ng/ml</b>         | <b>58 (38)</b>  |
| <b>Distant recurrence</b>                        | <b>(-)</b>               | <b>126 (83)</b> |
|                                                  | <b>(+)</b>               | <b>26 (17)</b>  |
