# Supplementary material for: Prognostic significance of Traf2- and Nck- interacting kinase (TNIK) in colorectal cancer
Source: Springer Nature journal article supplement (doi:10.1186/s12885-015-1783-y), 2015-10-24
Supplement: MOESM2 [file 9745348]

# Additional file 2: Heat map of 69 genes

Relative expression level

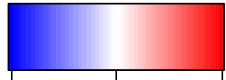

0.5-fold 1-fold 2-fold

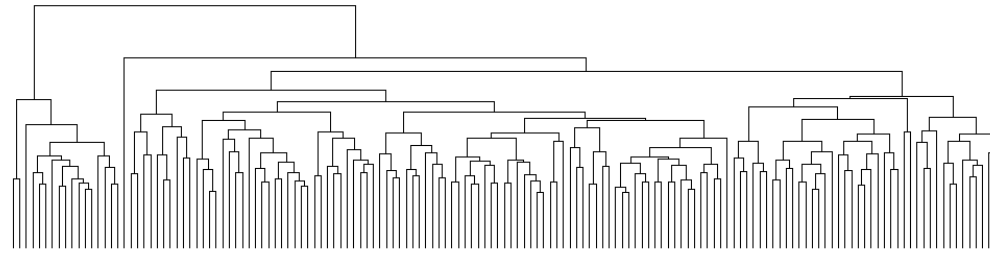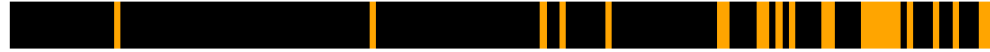

Recurrence  
Non recurrence

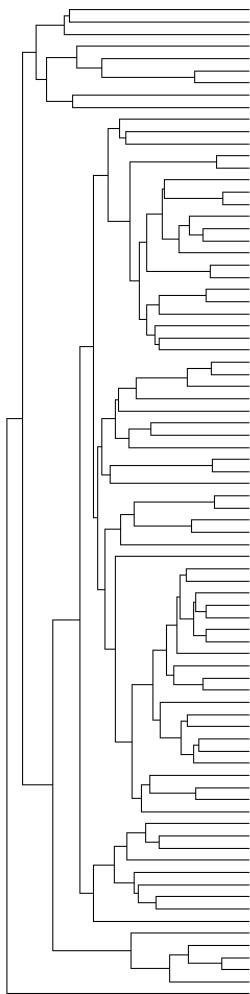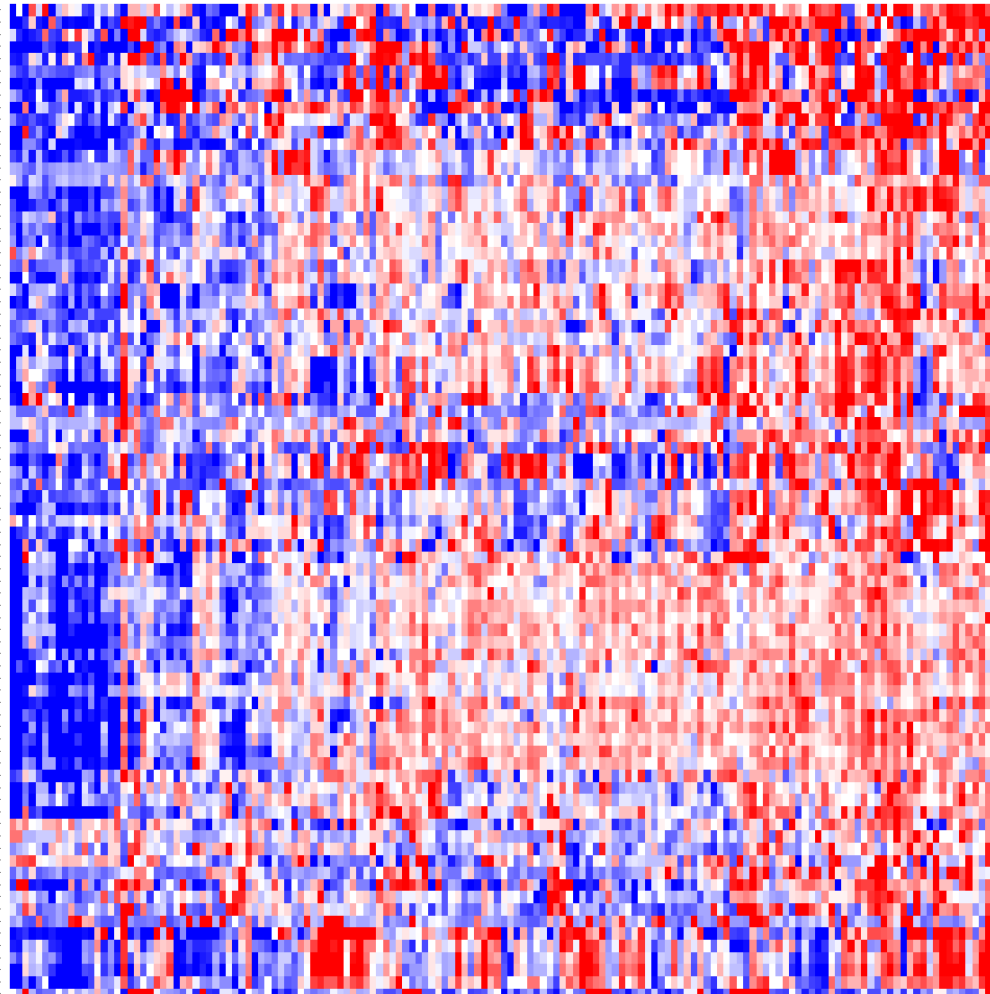

PRDM1  
EPH1  
KRT5B  
IL33  
CD904  
FAM168A  
FAM168A  
TCN1  
SERPINE5  
TMEM71  
IL17RD  
CREBB  
LPL  
LPL  
TNK  
ABHD2  
ABHD2  
ZNF578  
ZBED6  
LPGAT1  
PRFBP1  
PGAP1  
PGAP1  
PROX1  
PROX1  
CSGALNACT1  
NSUN7  
DACT1  
DPYSL2  
DACH1  
DACH1  
DACH1  
ITGA9  
GPR155  
KCNJ3  
KCNJ2  
DCDC2  
NETO2  
NETO2  
MCOLN3  
TNFRSF11B  
TNFRSF11B  
CHRM3  
CHRM3  
AMIGO2  
HIS2A2  
DNAJC3  
SESTD1  
CLN5  
RNF219  
INTS6  
RRP15  
ATF6  
ACSL4  
RAB39  
RPRD1A  
RPRD1A  
DCBLD2  
ANKRD2  
ETNK1  
KCTD3  
FGFR10P2  
G2E3  
SLC16A10  
PHLDA1  
PHLDA1  
FAM158B  
TESC  
LOC28192  
S100A2  
COL9A3  
PPP2R2C  
BAMBI  
BMP4  
M3D2  
NRN1  
SRP1  
THBS2  
COL11A1  
COL11A1  
CTNRC1  
IGF2 II IGFBP2

← **TNIK**
